# Supplementary material for: EBV Promotes Human CD8+ NKT Cell Development
Source: PubMed Central journal article supplement (PMC2873918; doi:10.1371/journal.ppat.1000915), 2010-05-20
Supplement: ppat.1000915.s007.pdf [file ppat.1000915.s007.pdf]

**Table S1**

Clinical information of normal control and latent EBV-infected individuals, and patients with IM or HL

| Patient*                          | Case numbers/Sex/<br>Average age(y)† | HLA Type‡                                                                           | Time to diagnosis<br>/Treatment  | Histological<br>type¶ | Advanced<br>stage¶ | EBV status |
|-----------------------------------|--------------------------------------|-------------------------------------------------------------------------------------|----------------------------------|-----------------------|--------------------|------------|
| <b>NS*</b>                        |                                      |                                                                                     |                                  |                       |                    |            |
| N1-N8                             | 5/M/28; 3/F/27                       | HLA-A2 <sup>+</sup> /DRB1(*03) <sup>+</sup> , HLA-B8 <sup>-</sup> /DQ5 <sup>-</sup> | -§                               | -                     | -                  | Negative   |
| N9-N12                            | 2/M/22; 2/F/24                       | HLA-B8 <sup>+</sup> /DQ5 <sup>+</sup> , HLA-A2 <sup>-</sup> /DRB1 <sup>-</sup>      | -                                | -                     | -                  | Negative   |
| N13-N16                           | 2/M/27; 2/F/31                       | HLA-B11 <sup>+</sup> /DQ5 <sup>+</sup> , HLA-A2 <sup>-</sup> /DRB1 <sup>-</sup>     | -                                | -                     | -                  | Negative   |
| <b>EBV<sup>+</sup>(La)*</b>       |                                      |                                                                                     |                                  |                       |                    |            |
| S17-S105                          | 50/M/34; 39/F/30                     | HLA-A2 <sup>+</sup> /DRB1(*03) <sup>+</sup> , HLA-B8 <sup>-</sup> /DQ5 <sup>-</sup> | -                                | -                     | -                  | Positive   |
| S106-S126                         | 12/M/31; 9/F/25                      | HLA-B8 <sup>+</sup> /DQ5 <sup>+</sup> , HLA-A2 <sup>-</sup> /DRB1 <sup>-</sup>      | -                                | -                     | -                  | Positive   |
| S127-S144                         | 10/M/24; 8/F/32                      | HLA-B11 <sup>+</sup> /DQ5 <sup>+</sup> , HLA-A2 <sup>-</sup> /DRB1 <sup>-</sup>     | -                                | -                     | -                  | Positive   |
| <b>EBV<sup>+</sup>(IMa, IMy)*</b> |                                      |                                                                                     |                                  |                       |                    |            |
| P145-P152                         | 3/M/5; 5/F/6                         | HLA-A2 <sup>+</sup> /DRB1(*03) <sup>+</sup> , HLA-B8 <sup>-</sup> /DQ5 <sup>-</sup> | Newly diagnosed; NT <sup>#</sup> | -                     | -                  | Positive   |
| P153-P157                         | 3/M/7; 2/F/4                         | HLA-B8 <sup>+</sup> /DQ5 <sup>+</sup> , HLA-A2 <sup>-</sup> /DRB1 <sup>-</sup>      | Newly diagnosed; NT              | -                     | -                  | Positive   |
| P158-P161                         | 2/M/4; 2/F/10                        | HLA-B11 <sup>+</sup> /DQ5 <sup>+</sup> , HLA-A2 <sup>-</sup> /DRB1 <sup>-</sup>     | Newly diagnosed; NT              | -                     | -                  | Positive   |
| <b>EBV<sup>+</sup>(HL)*</b>       |                                      |                                                                                     |                                  |                       |                    |            |
| P162-P169                         | 5/M/41; 3/F/33                       | HLA-A2 <sup>+</sup> /DRB1(*03) <sup>+</sup> , HLA-B8 <sup>-</sup> /DQ5 <sup>-</sup> | Newly diagnosed; NT              | SD¶                   | SD¶                | Positive   |
| P170-P173                         | 2/M/44; 2/F/38                       | HLA-B8 <sup>+</sup> /DQ5 <sup>+</sup> , HLA-A2 <sup>-</sup> /DRB1 <sup>-</sup>      | Newly diagnosed; NT              | SD                    | SD                 | Positive   |
| P174-P177                         | 3/M/41; 1/F/43                       | HLA-B11 <sup>+</sup> /DQ5 <sup>+</sup> , HLA-A2 <sup>-</sup> /DRB1 <sup>-</sup>     | Newly diagnosed; NT              | SD                    | SD                 | Positive   |

\*. **NS**, normal control subjects (healthy EBV seronegative individuals); **EBV<sup>+</sup>(La)**, healthy latent EBV-infected subjects (healthy EBV seropositive individuals);

**EBV<sup>+</sup>(IMa)**, newly-onset acute infectious mononucleosis patients; **EBV<sup>+</sup>(IMy)**, infectious mononucleosis patients year 1 post-onset; **EBV<sup>+</sup>(HL)**, newly diagnosed EBV-associated Hodgkin lymphoma patients.

†. M, male (for example, 5/M/28 presented 5 male individuals with an average age 28); F, female (for example, 3/F/27 presented 3 female individuals with an average age 27); Average ages were presented as mean±s.d. For simplification, the standard deviations (s.d.) were not presented in the table.

‡. All eligible individuals for this study were either matched HLA-A2 and HLA-DRB1(\*03) (the most prevalent HLA-type for Eastern and Southern Chinese populations) and mismatched HLA-B8 and HLA-DQ5, or matched HLA-B8 and HLA-DQ5 and mismatched HLA-A2 and HLA-DRB1, or matched HLA-B11 and HLA-DQ5 and mismatched HLA-A2 and HLA-DRB1.

§. -, not applicable.

¶. SD, see details; Details were as follows.

Hodgkin lymphoma (HL) was diagnosed according to the WHO criteria, and staged according to the Ann Arbor classification (Ref. 1). Histological type of HL: NS, nodular sclerosing; MC, mixed cellularity; LR, lymphocyte rich; NL, nodular lymphoma; Details as follows: P162, NS; P163, MC; P164, NS; P165, NL; P166, LR; P167, MC; P168, NL; P169, LR; P170, MC; P171, NL; P172, NS; P173, NS; P174, MC; P175, NS; P176, MC; P177, NS.

Clinical stage of HL: classified as stages IIa/IIb/III/IV, staged as per Ann Arbor Criteria (with Cotswold modification). Details as follows: P162, IIb; P163, IIIa; P164, IV; P165, IIIb; P166, IIIa; P167, IIIa; P168, IV; P169, IIIa; P170, IV; P171, IIIb; P172, IIb; P173, IIIb; P174, IIIa; P175, IIb; P176, IIIb; P177, IIa.

Ref. 1. Jaffe ES, Harris NL, Stein H, Vardiman JW (2001) WHO Health Organization Classification of Tumours. Pathology and Genetics. Tumours of Haematopoietic and Lymphoid Tissues. IARC Press, Lyon

||. The status of EBV-infection of all individuals in this study was determined by Q-PCR and serologic assays.

#. NT, no previous chemotherapy, radiotherapy and immunotherapy, except EBV<sup>+</sup>(IMy) patients were given a short course of antiviral-therapy in the lytic phase, but no current therapy when blood samples were taken.
