# Supplementary material for: EBV Promotes Human CD8+ NKT Cell Development
Source: PubMed Central journal article supplement (PMC2873918; doi:10.1371/journal.ppat.1000915), 2010-05-20
Supplement: ppat.1000915.s009.pdf [file ppat.1000915.s009.pdf]

**Table S3**

The sequences of primers and probes for mRNA and DNA detection in Q-PCR and Southern blot assays

| <b>Target</b>              | <b>Sense</b>                   | <b>Antisense</b>             |
|----------------------------|--------------------------------|------------------------------|
| IL-7                       | 5'-CAGACCATGTTCCATGTTTC-3'     | 5'-GAATTGCCTCAACTTTCGAG-3'   |
| IL-7R $\alpha$             | 5'-TCGCAGCACTCACTGACC-3'       | 5'-CGGGAAGGAGCCAATGAC-3'     |
| IL-15                      | 5'-TAAAACAGAAGCCAACTG-3'       | 5'-CAAGAAGTGTTGATGAACAT-3'   |
| IL-15R $\alpha$            | 5'-GTCAAGAGCTACAGCTTGAC-3'     | 5'-GGTGAGCTTCTCCTGGAG-3'     |
| V $\alpha$ 24 <sup>a</sup> | 5'-GGGAGAGGTCCTGTTTC-3'        | -                            |
| J $\alpha$ 18 <sup>a</sup> | -                              | 5'-CCTCTCCAAAGTATAGCCTCC-3'  |
| C $\alpha$                 | 5'-GAACCCTGACCCTGCCGTGTA-3'    | 5'-CACTTTCAGG AGGAGGATTCG-3' |
| LMP1                       | 5'-TCCTCCTCTGGCGCTACTG -3'     | 5'-TCATCACTGTGTCGTTGTCC-3'   |
| LMP1, P <sup>b</sup>       | 5'-GAACAGCACAATTCCAAGGAACAA-3' |                              |
| EBNA1                      | 5'-GATGAGCGTTTGGGAGAGCTG-3'    | 5'-TCCTCGTCCATGGTTATCAC-3'   |
| EBNA1, P <sup>b</sup>      | 5'-AGACCTGGGAGCAGATTCAC-3'     |                              |
| BZLF1                      | 5'-AGGTGCCTTTTGTACAAGCT-3'     | 5'-ATAATGGAGTCAACATCCAG-3'   |
| BZLF1, P <sup>b</sup>      | 5'-ATACAAGAATCGGGTGGCTT-3'     |                              |
| BALF2                      | 5'-GGACTTTTTGGGCAACTTCTC-3'    | 5'-TGACCAGGTCCTTGAGGTG-3'    |
| BALF2, P <sup>a</sup>      | 5'-TGAACACGCTCTTCTTTAGGC-3'    |                              |
| RAZ                        | 5'-AGGCCTAAAAAGGATGGCTT-3'     | 5'-ACCAATGTCTGCTAGCTGTT-3'   |
| RAZ, P <sup>b</sup>        | 5'-GGTGCTGCATAAGCTTGATA-3'     |                              |

**a**, Primers for V $\alpha$ 24-J $\alpha$ 18. **b**, P, probe.
