# Supplementary figures and images for: EBV Promotes Human CD8+ NKT Cell Development
Source: PubMed Central journal article supplement (PMC2873918; doi:10.1371/journal.ppat.1000915), 2010-05-20

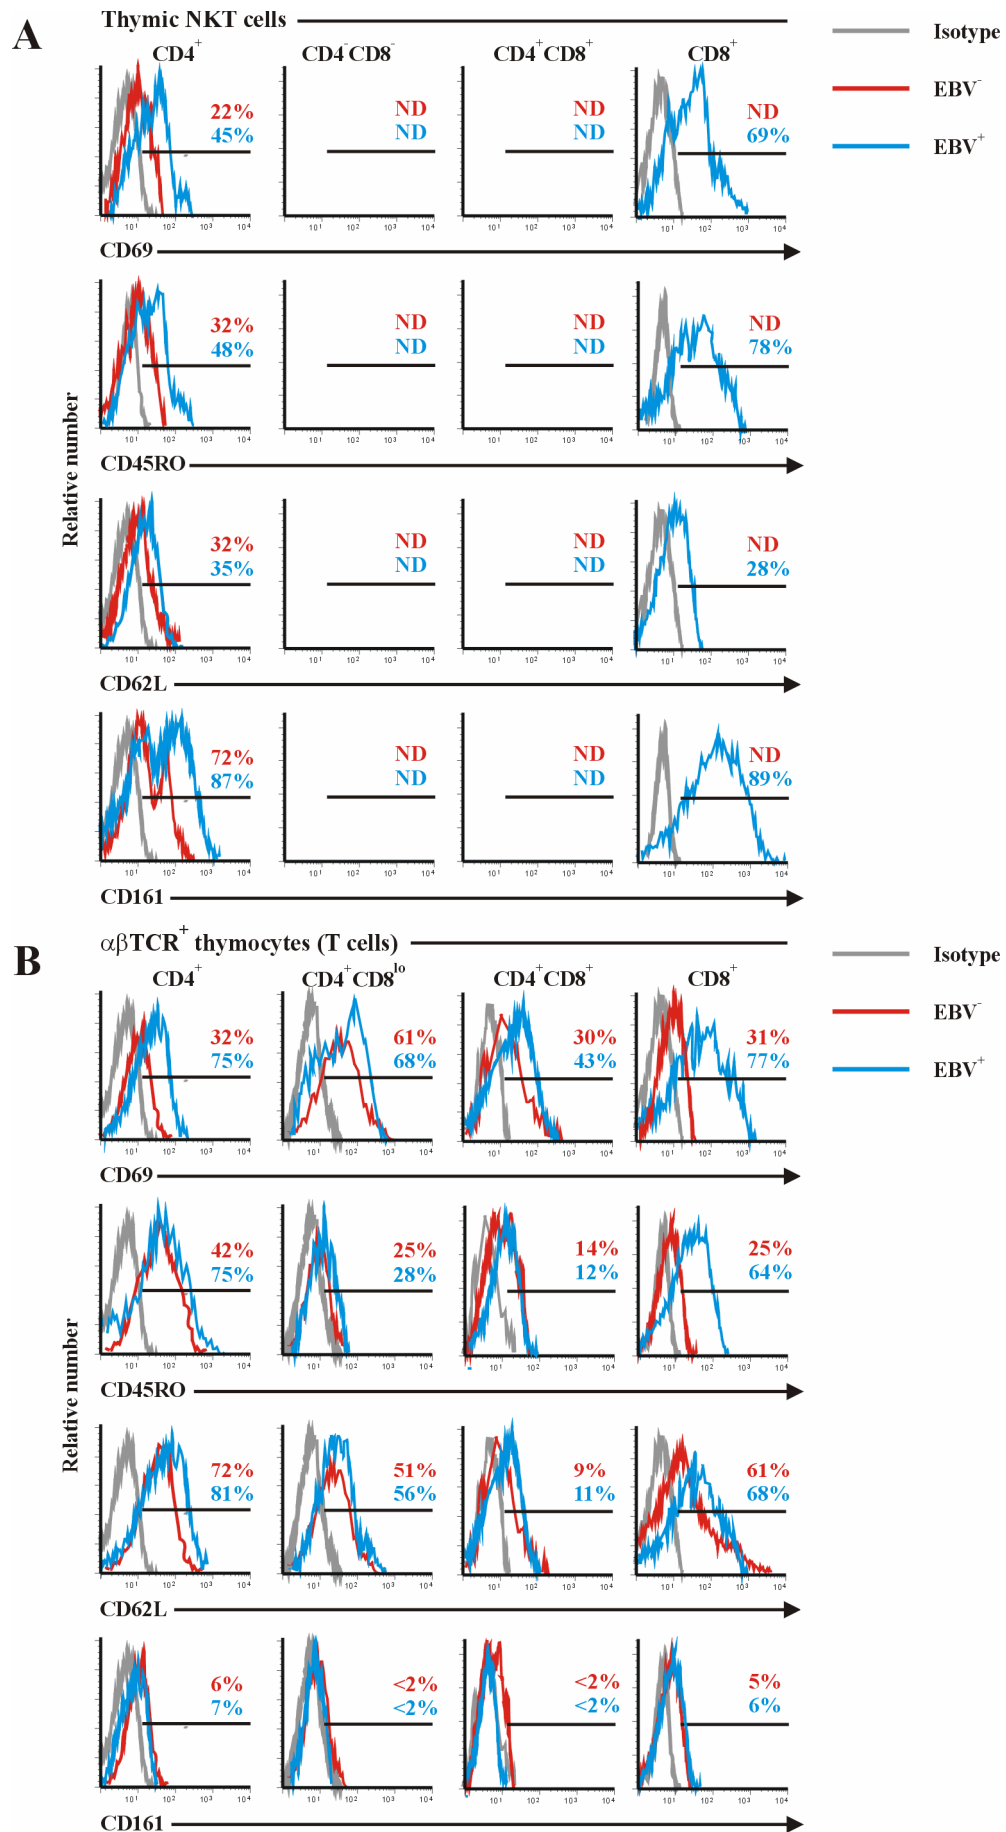

Figure S1

Supplement: ppat.1000915.s001.pdf [file ppat.1000915.s001.pdf]

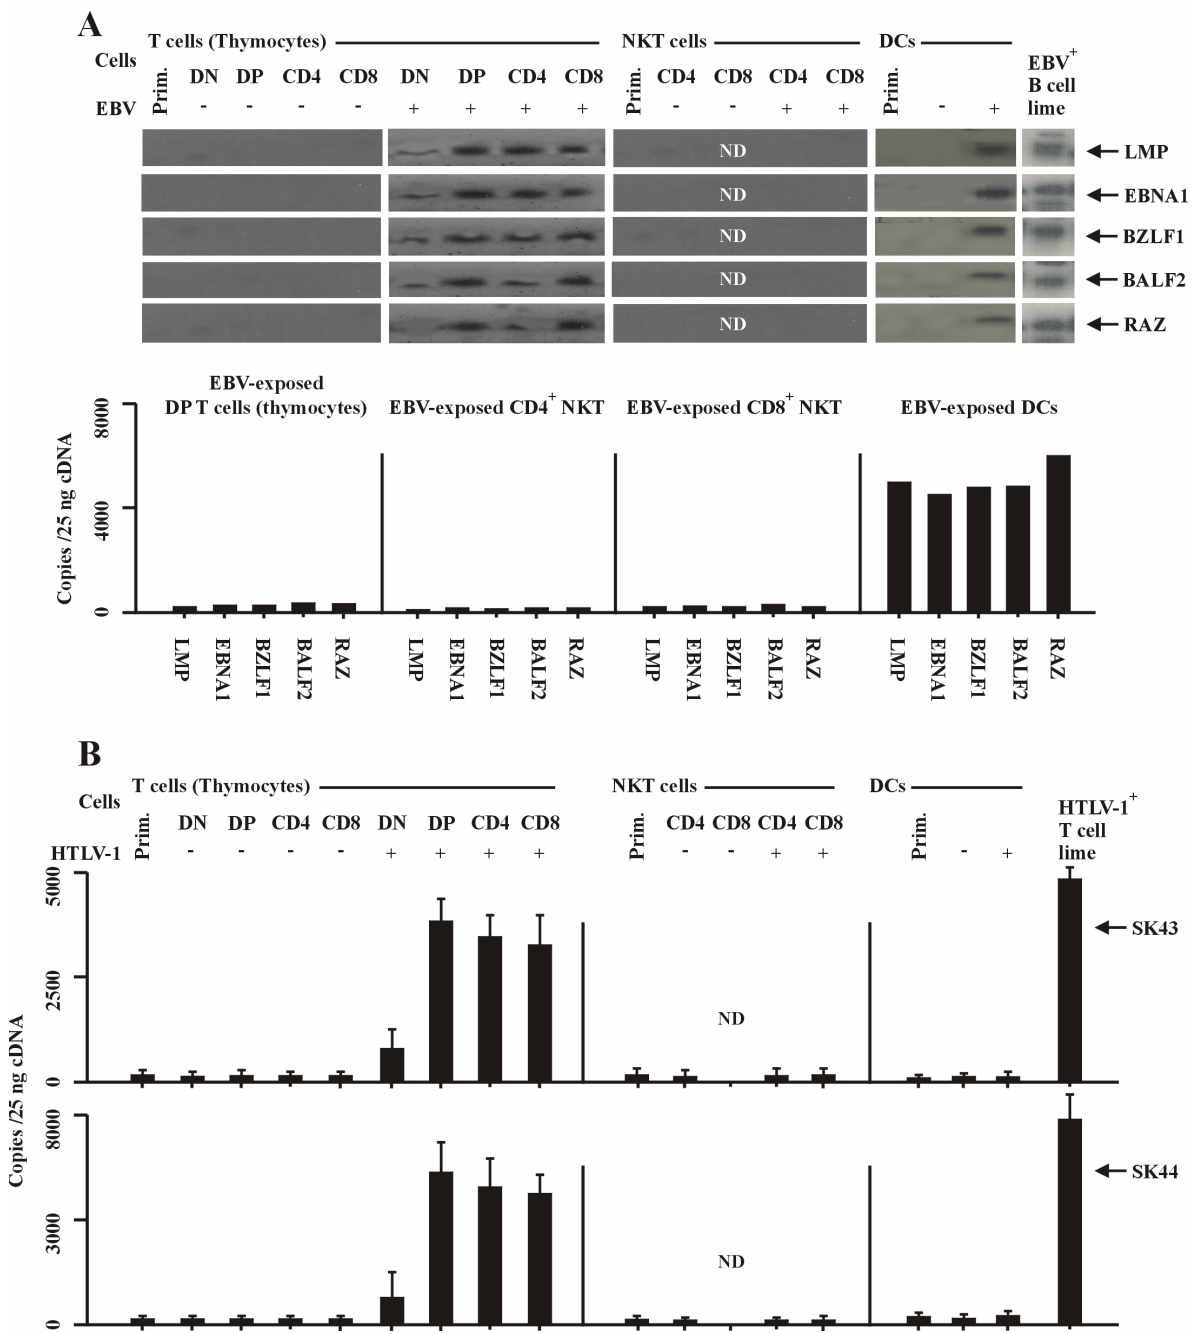

Figure S2

Supplement: ppat.1000915.s002.pdf [file ppat.1000915.s002.pdf]

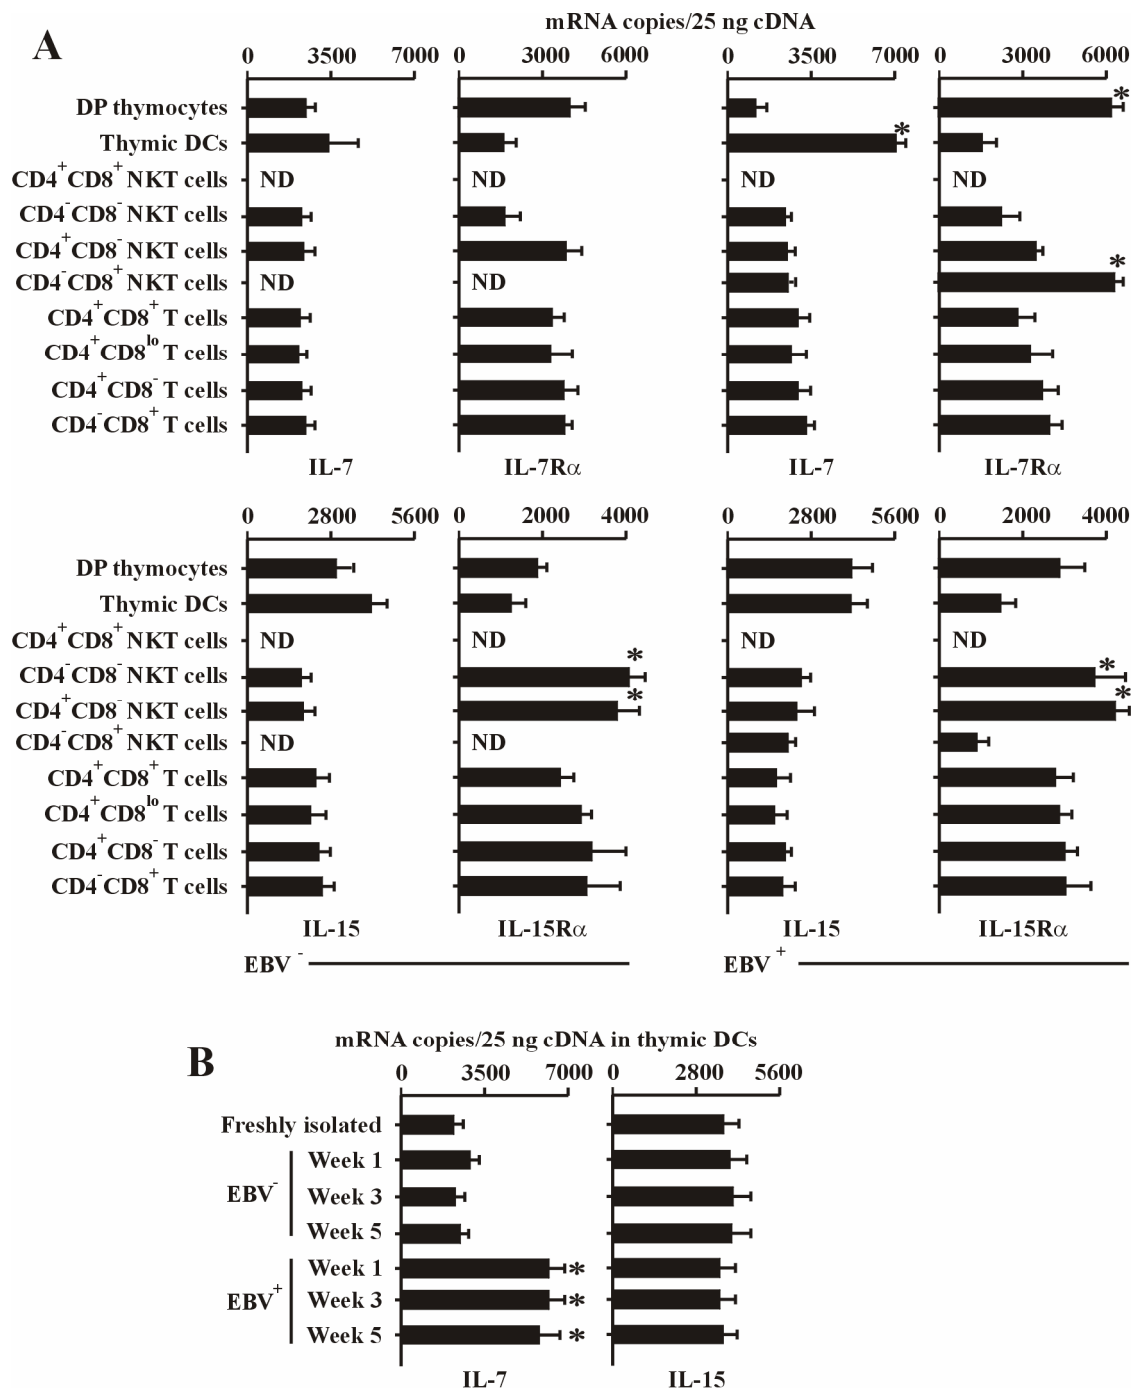

Figure S3

Supplement: ppat.1000915.s003.pdf [file ppat.1000915.s003.pdf]

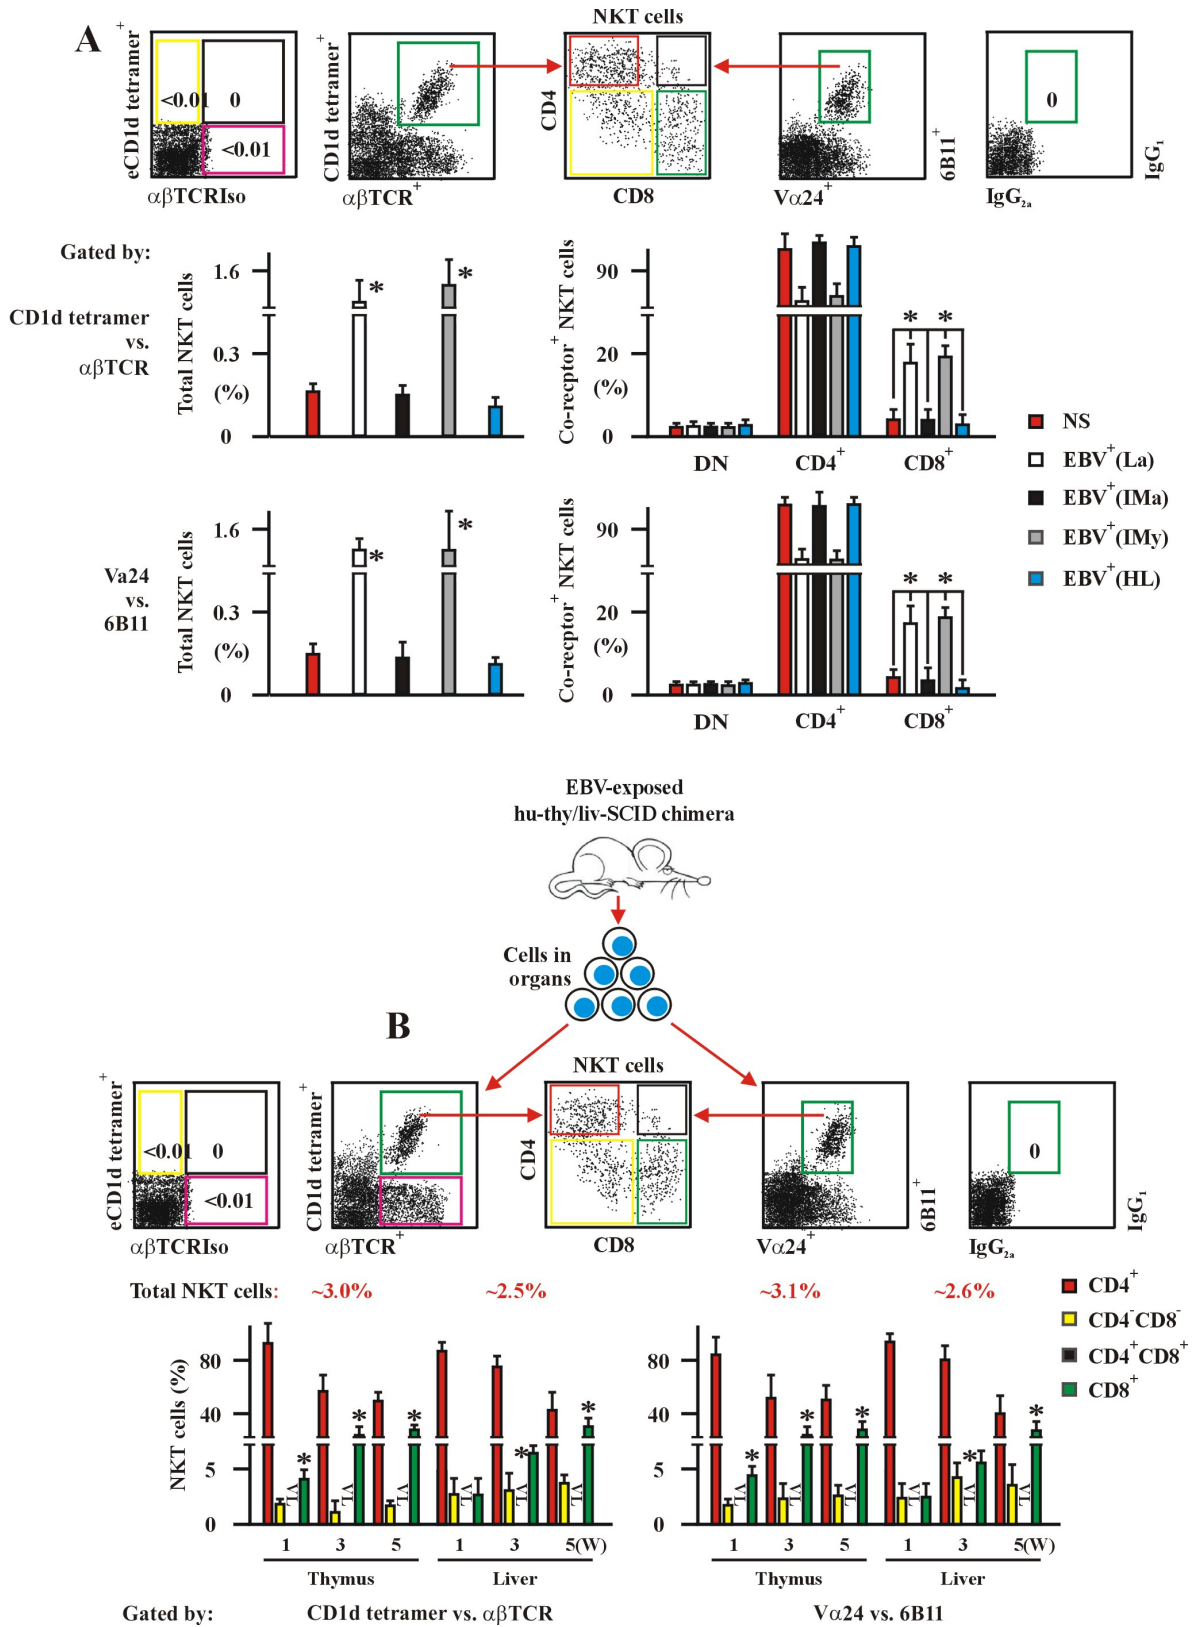

Figure S4

Supplement: ppat.1000915.s004.pdf [file ppat.1000915.s004.pdf]

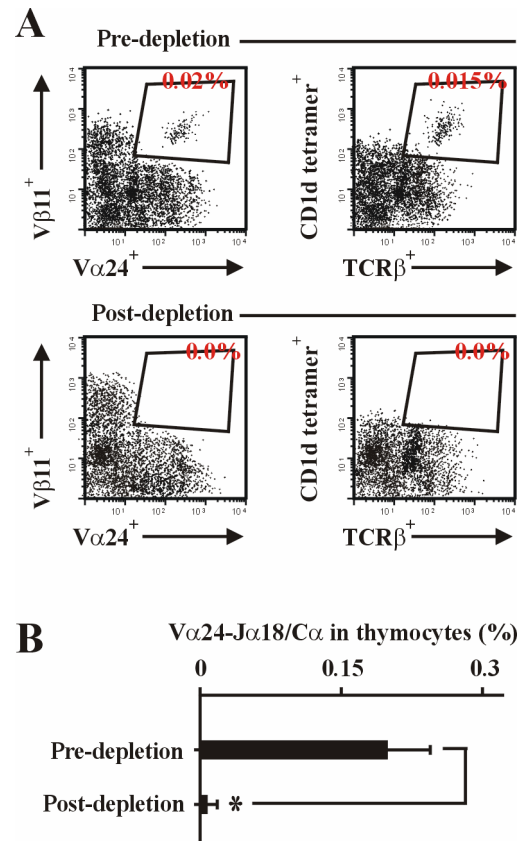

**Figure S5**

Supplement: ppat.1000915.s005.pdf [file ppat.1000915.s005.pdf]

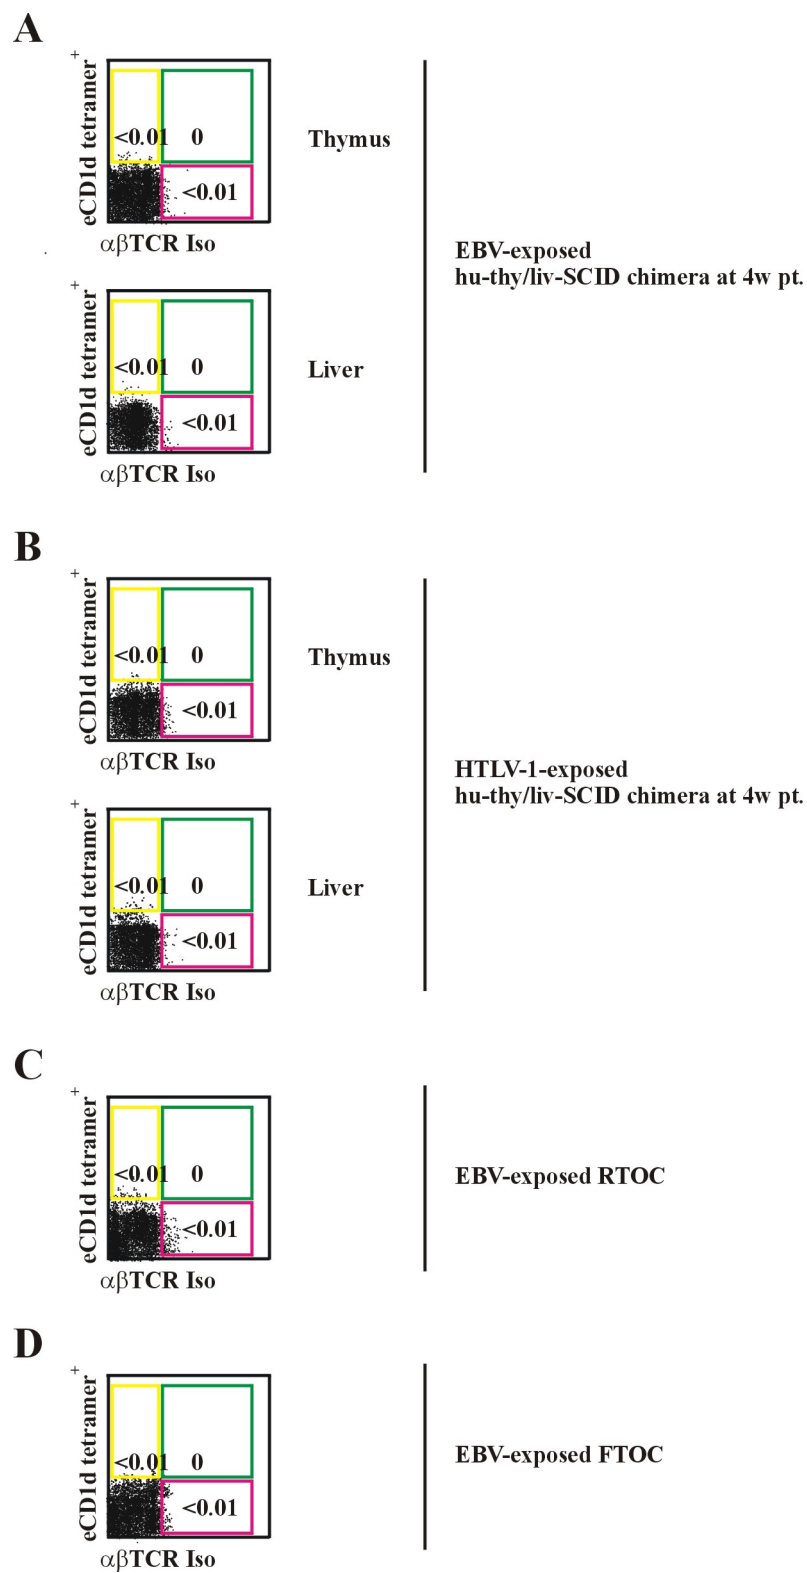

Figure S6

Supplement: ppat.1000915.s006.pdf [file ppat.1000915.s006.pdf]
